# Supplementary material
Source: Springer Nature journal article supplement (https://www.springermedizin.de/resource/supplementary/12931_2010_1027_MOESM1_ESM.pdf/9425370)
Supplement: MOESM1 [file 9425370]

COREA (n=1520)

**Inclusion criteria**

severe asthma according to the  
GINA guidelines

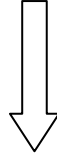

Severe asthma (n=352)

**Inclusion criteria**

1. patients on the treatment with moderate- to high-dose ICS and an LABA combination inhaler
2. patients who underwent all 3 pulmonary function tests under stable conditions
3. patients who were adequately treated and adherent to prescribed medications

**Exclusion criteria**

1. patients with any missing spirometry data at baseline or follow up visits
2. patients with acute exacerbated asthma
3. patients with serious non-pulmonary diseases or apparent pulmonary diseases such as emphysema or bronchiectasis on chest radiography

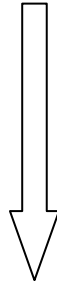

Severe asthma for the current study (n=235)

**Evaluation for persistent airway obstruction**

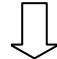

FAO (Fixed airway obstruction)  
FEV1/FEV <0.7  
(n=119)

RAO (Reversible airway obstruction)  
FEV1/FVC  $\geq$ 0.7  
(n=116)
